# Supplementary material
Source: PubMed Central journal article supplement (PMC8592145)
Supplement: tpmd210214.SD1.pdf [file tpmd210214.SD1.pdf]

Supplemental Table 1: Molecular markers of resistance and association with treatment outcome, artemether-lumefantrine arms, DRC therapeutic efficacy study, 2017

|                                  | All samples    | Reinfection Day 0 | Recrudescence + Reinfection<br>Day of failure | P            |
|----------------------------------|----------------|-------------------|-----------------------------------------------|--------------|
| <b><i>Pfk13</i></b>              |                |                   |                                               |              |
| Successfully sequenced           | 191/209 (91%)  | 110/118 (93%)     | 81/91 (89%)                                   |              |
| Wild type                        | 185 (95.9%)    | 107 (97.3%)       | 78 (96.3)                                     | Ref          |
| Synonymous <sup>a</sup>          | 6 (3%)         | 3 (3%)            | 3 (4%)                                        | 1            |
| Non-synonymous                   | 0 (0%)         | 0 (0%)            | 0 (0%)                                        | NA           |
| <b><i>Pfmdr1</i><sup>b</sup></b> |                |                   |                                               |              |
| Successfully sequenced           | 158/158 (100%) | 67/67 (100%)      | 91/91 (100%)                                  | -            |
| N86                              | 121 (77%)      | 43 (64%)          | 78 (86%)                                      | Ref          |
| 86N/Y                            | 6 (4%)         | 4 (6%)            | 2 (2%)                                        | 0.270        |
| 86Y                              | 31 (20%)       | 20 (30%)          | 11 (12%)                                      | <b>0.007</b> |
| Y184                             | 106 (67%)      | 39 (58%)          | 67 (74%)                                      | Ref          |
| 184Y/F                           | 28 (18%)       | 17 (25%)          | 11 (12%)                                      | <b>0.040</b> |
| 184F                             | 24 (15%)       | 11 (16%)          | 13 (14%)                                      | 0.551        |
| D1246                            | 140 (89%)      | 60 (90%)          | 80 (88%)                                      | Ref          |
| 1246D/Y                          | 16 (10%)       | 6 (9%)            | 10 (11%)                                      | 0.895        |
| 1246Y                            | 2 (1%)         | 1 (1%)            | 1 (1%)                                        | 1            |
| NYD                              | 105 (66%)      | 39 (58%)          | 66 (73%)                                      | Ref          |
| NFD                              | 43 (27%)       | 20 (30%)          | 23 (25%)                                      | 0.383        |
| NFY                              | 2 (1%)         | 0 (0%)            | 2 (2%)                                        | 0.289        |
| NYY                              | 13 (8%)        | 3 (4%)            | 10 (11%)                                      | 0.499        |
| YFD                              | 10 (6%)        | 9 (13%)           | 1 (1%)                                        | <b>0.003</b> |
| YFY                              | 0 (0%)         | 0 (0%)            | 0 (0%)                                        | NA           |
| YYD                              | 33 (21%)       | 20 (30%)          | 13 (14%)                                      | 0.972        |
| YYY                              | 4 (3%)         | 4 (6%)            | 0 (0%)                                        | 0.715        |

<sup>a</sup>Synonymous mutations include P417P, C469C, R471R, S477S, T478T, G496G, Y511Y, R539R, S576S,

<sup>b</sup>*pfmdr1* haplotype constructed according to amino acids at positions 86, 184, and 1246; mixed infections included in numerator for each haplotype

Supplemental Table 2: Molecular markers of resistance and association with treatment outcome, artesunate-amodiaquine arms, Democratic Republic of the Congo therapeutic efficacy study, 2017

|                                    | All samples  | Reinfection Day 0 | Recrudescence + Reinfection Day<br>of failure | p-value |
|------------------------------------|--------------|-------------------|-----------------------------------------------|---------|
| <b><i>Pf</i>k13</b>                |              |                   |                                               |         |
| Successfully sequenced             | 87/90 (97%)  | 42/43 (98%)       | 45/47 (96%)                                   | -       |
| Wild type                          | 85 (98%)     | 41 (98%)          | 43 (96%)                                      | Ref     |
| Synonymous <sup>a</sup>            | 3 (3%)       | 1 (2%)            | 2 (4%)                                        | 1       |
| Non-synonymous                     | 0 (0%)       | 0 (0%)            | 0 (0%)                                        | NA      |
| <b><i>Pf</i>mdr1<sup>b</sup></b>   |              |                   |                                               |         |
| Successfully sequenced             | 81/85 (95%)  | 36/38 (95%)       | 45/47 (96%)                                   | -       |
| N86                                | 15 (19%)     | 9 (25%)           | 6 (13%)                                       | Ref     |
| 86N/Y                              | 13 (16%)     | 6 (17%)           | 7 (16%)                                       | 0.725   |
| 86Y                                | 53 (65%)     | 21 (58%)          | 32 (71%)                                      | 0.268   |
| Y184                               | 49 (60%)     | 22 (61%)          | 27 (60%)                                      | Ref     |
| 184Y/F                             | 14 (17%)     | 6 (17%)           | 8 (18%)                                       | 1       |
| 184F                               | 18 (22%)     | 8 (22%)           | 10 (22%)                                      | 1       |
| D1246                              | 51 (63%)     | 22 (61%)          | 29 (64%)                                      | Ref     |
| 1246D/Y                            | 12 (15%)     | 5 (14%)           | 7 (16%)                                       | 1       |
| 1246Y                              | 18 (22%)     | 9 (25%)           | 9 (20%)                                       | 0.817   |
| NYD                                | 17 (21%)     | 9 (25%)           | 8 (18%)                                       | Ref     |
| NFD                                | 18 (22%)     | 8 (22%)           | 10 (22%)                                      | 0.870   |
| NFY                                | 4 (5%)       | 1 (3%)            | 3 (7%)                                        | 0.662   |
| NYY                                | 5 (6%)       | 3 (8%)            | 2 (4%)                                        | 1       |
| YFD                                | 69 (85%)     | 27 (75%)          | 42 (93%)                                      | 0.446   |
| YFY                                | 5 (6%)       | 1 (3%)            | 4 (9%)                                        | 0.436   |
| YYD                                | 40 (49%)     | 17 (47%)          | 23 (51%)                                      | 0.663   |
| YYY                                | 26 (32%)     | 13 (36%)          | 13 (29%)                                      | 1       |
| <b><i>Pf</i>ert<sup>c, d</sup></b> |              |                   |                                               |         |
| Successfully sequenced             | 85/85 (100%) | 38/38 (100%)      | 47/47 (100%)                                  | -       |
| M74                                | 8 (9%)       | 6 (16%)           | 2 (4%)                                        | Ref     |
| 74M/I                              | 2 (2%)       | 2 (5%)            | 0 (0%)                                        | 1       |
| 74I                                | 75 (88%)     | 30 (79%)          | 45 (96%)                                      | 0.128   |
| N75                                | 10 (12%)     | 8 (21%)           | 2 (4%)                                        | Ref     |

|       |          |          |          |              |
|-------|----------|----------|----------|--------------|
| 75N/E | 1 (1%)   | 0 (0%)   | 1 (2%)   | 0.546        |
| 75E   | 74 (87%) | 30 (79%) | 44 (94%) | <b>0.042</b> |
| K76   | 9 (11%)  | 8 (21%)  | 1 (2%)   | Ref          |
| 76K/T | 1 (1%)   | 0 (0%)   | 1 (2%)   | 0.4          |
| 76T   | 75 (88%) | 30 (79%) | 45 (96%) | <b>0.013</b> |
| CVMNK | 9 (11%)  | 8 (21%)  | 1 (2%)   | Ref          |
| CVIET | 75 (88%) | 30 (79%) | 45 (96%) | <b>0.013</b> |
| CVMNT | 1 (1%)   | 0 (0%)   | 1 (2%)   | 0.400        |
| CVINK | 3 (6%)   | 2 (6%)   | 1 (2%)   | 0.909        |

<sup>a</sup>Synonymous mutations include P417P, C469C, R471R, S477S, T478T, G496G, Y511Y, R539R, S576S,

<sup>b</sup>*pfmdr1* haplotype constructed according to amino acids at positions 86, 184, and 1246; mixed infections included in numerator for each haplotype

<sup>c</sup>*pfprt* haplotype constructed according to amino acids at positions 72, 73, 74, 75, and 76; mixed infections included in numerator for each haplotype

<sup>d</sup>all samples were wildtype for positions 72 (C) and 73 (D)

Supplemental Table 3: Molecular markers of resistance and association with treatment outcome, dihydroartemisinin-piperaquine arms, Democratic Republic of the Congo therapeutic efficacy study, 2017

|                                  | All samples    | Reinfection Day 0 | Recrudescence + Reinfection<br>Day of failure | <i>P</i> |
|----------------------------------|----------------|-------------------|-----------------------------------------------|----------|
| <b><i>Pfk13</i></b>              |                |                   |                                               |          |
| Successfully sequenced           | 208/224 (93%)  | 99/102 (97%)      | 109/122 (89%)                                 | -        |
| Wild type                        | 199 (96%)      | 96 (97%)          | 103 (95%)                                     | Ref      |
| Synonymous <sup>a</sup>          | 8 (4%)         | 0 (0%)            | 5 (5%)                                        | 0.796    |
| Non-synonymous <sup>b</sup>      | 1 (0.5%)       | 0 (0%)            | 1 (0.9%)                                      | 1        |
| <b><i>Pfmdr1</i><sup>c</sup></b> |                |                   |                                               |          |
| Successfully sequenced           | 223/223 (100%) | 101/101 (100%)    | 122/122(100%)                                 | -        |
| N86                              | 127 (57%)      | 57 (56%)          | 70 (57%)                                      | Ref      |
| 86N/Y                            | 33 (15%)       | 16 (16%)          | 17 (14%)                                      | 0.859    |
| 86Y                              | 63 (28%)       | 28 (28%)          | 35 (29%)                                      | 1        |
| Y184                             | 113 (51%)      | 58 (57%)          | 55 (45%)                                      | Ref      |
| 184Y/F                           | 60 (27%)       | 22 (22%)          | 38 (31%)                                      | 0.092    |
| 184F                             | 50 (22%)       | 21 (21%)          | 29 (24%)                                      | 0.353    |
| D1246                            | 188 (84%)      | 84 (83%)          | 104 (85%)                                     | Ref      |
| 1246D/Y                          | 7 (3%)         | 2 (2%)            | 5 (4%)                                        | 0.662    |
| 1246Y                            | 28 (13%)       | 15 (15%)          | 13 (11%)                                      | 0.497    |
| NYD                              | 118 (53%)      | 53 (52%)          | 65 (53%)                                      | Ref      |
| NFD                              | 81 (36%)       | 35 (35%)          | 46 (38%)                                      | 0.927    |
| NFY                              | 11 (5%)        | 4 (4%)            | 7 (6%)                                        | 0.828    |
| NYY                              | 11 (5%)        | 5 (5%)            | 6 (5%)                                        | 1        |
| YFD                              | 71 (32%)       | 34 (34%)          | 37 (30%)                                      | 0.805    |
| YFY                              | 9 (4%)         | 3 (3%)            | 6 (5%)                                        | 0.755    |
| YYD                              | 59 (26%)       | 25 (25%)          | 34 (28%)                                      | 0.874    |
| YYY                              | 28 (13%)       | 15 (15%)          | 13 (11%)                                      | 0.538    |

<sup>a</sup>Synonymous mutations include P417P, C469C, R471R, S477S, T478T, G496G, Y511Y, R539R, S576S,

<sup>b</sup>Non-synonymous mutation, S477Y

<sup>c</sup>*pfmdr1* haplotype constructed according to amino acids at positions 86, 184, and 1246; mixed infections included in numerator for each haplotype

Supplemental figure 1: Multiplicity of infection of day 0 and day of recurrence samples from treatment failures as determined by the maximum number of alleles detected among seven neutral microsatellite markers, Democratic Republic of the Congo therapeutic efficacy study, 2017

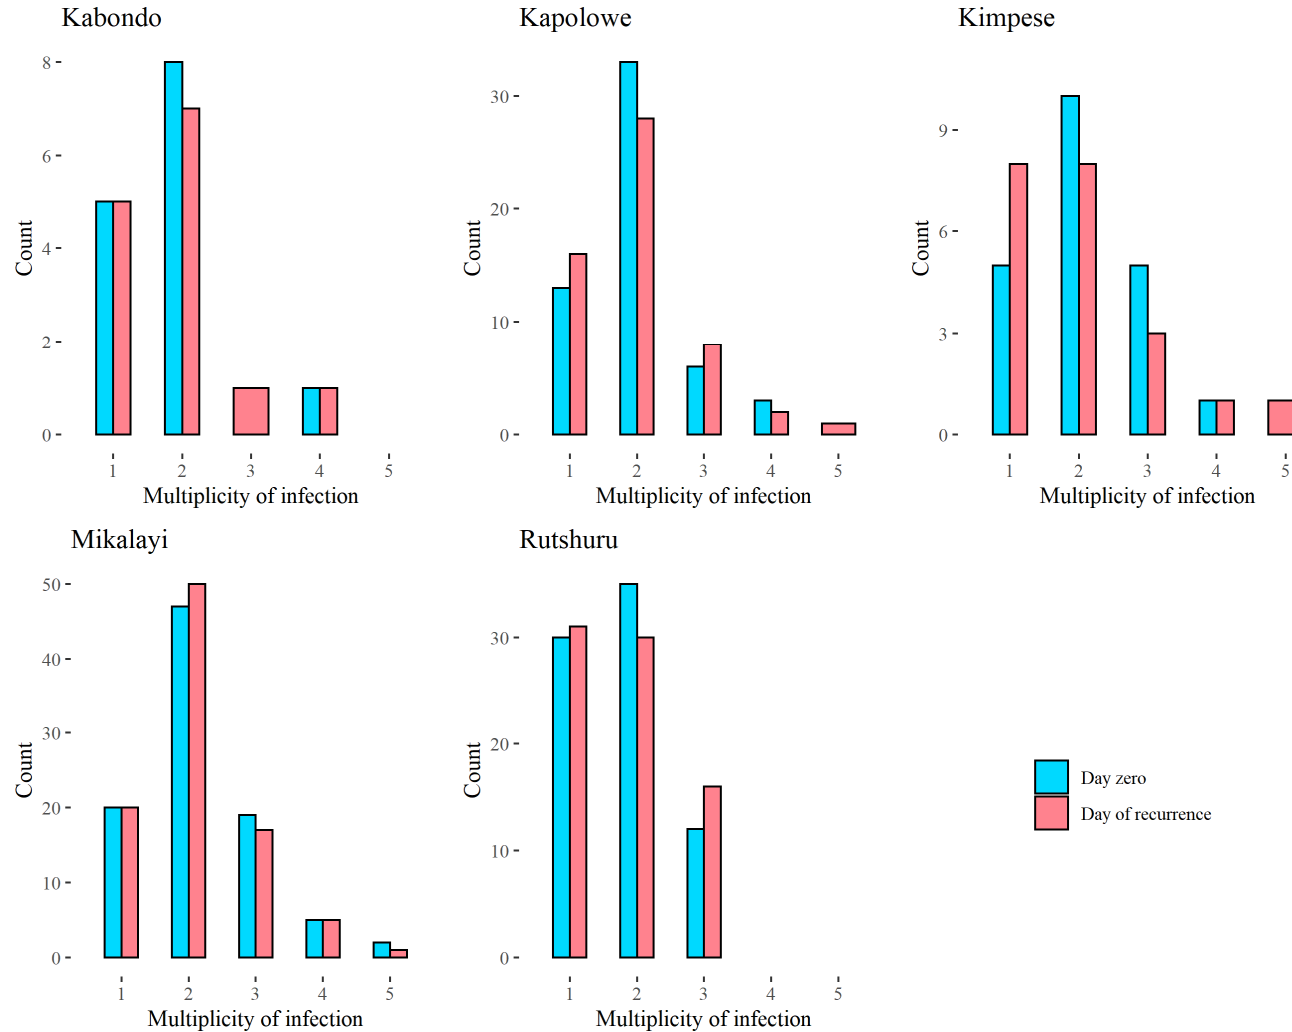

Supplemental figure 2: Histogram of posterior probability of recrudescence of all late treatment failures for which the probability of recrudescence is over 0% (n=114).

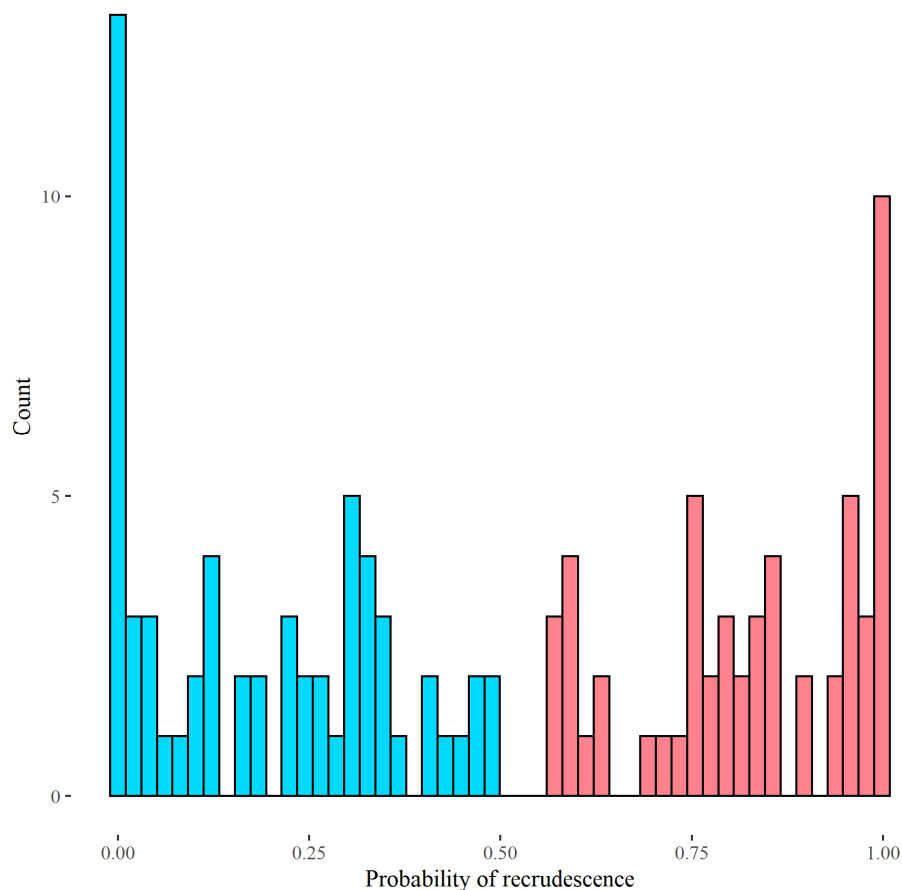

The sum posterior probability of recrudescence was 57. There were 54 samples with a posterior probability of recrudescence of .5 or higher (and labeled as a recrudescence). The mean posterior probability of recrudescence was 0.04 (standard deviation= 0.17). Among late failures for which the posterior probability of recrudescence was >0 (n=114, 42.5%), the mean posterior probability of recrudescence was 0.49 (standard deviation= 0.37)

Supplemental figure 3: Assessment of the use of different cutoffs of posterior probability of recrudescence derived using a Bayesian algorithm for interpreting microsatellite data for molecular correction, Democratic Republic of the Congo therapeutic efficacy study, 2017

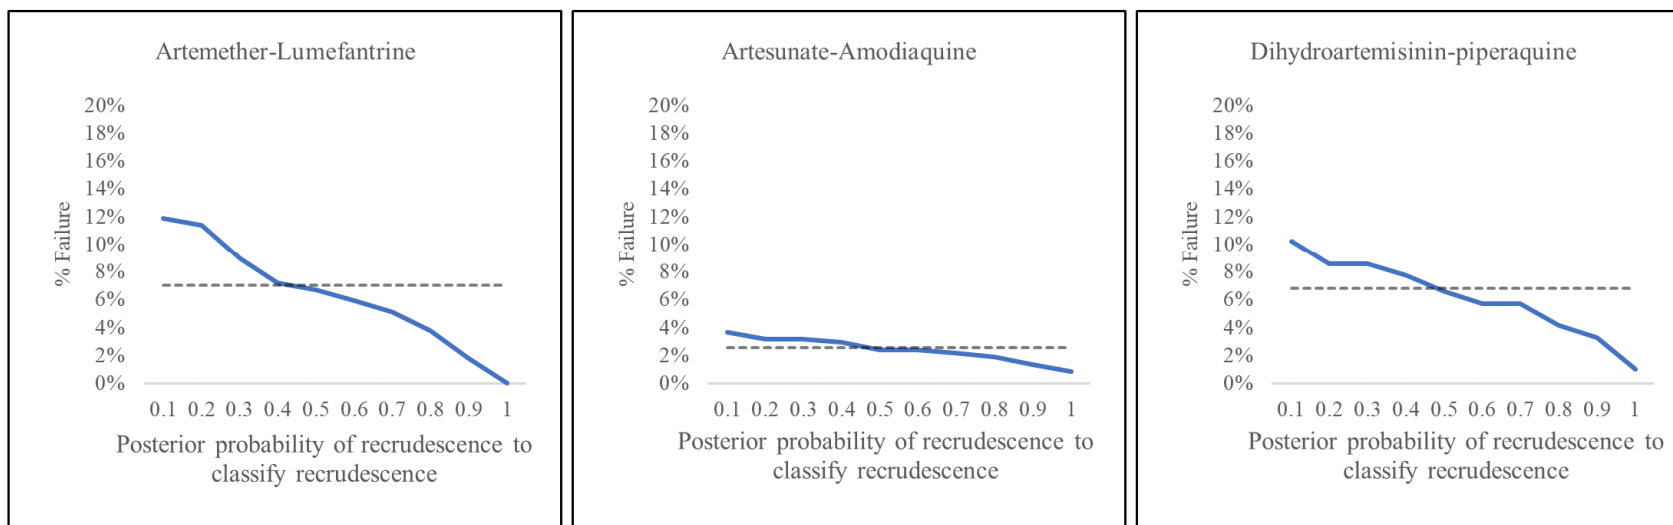

Failure rate estimates obtained using the Bayesian analysis algorithm for artemether-lumefantrine, artesunate-amodiaquine, and dihydroartemisinin-piperaquine. The failure rate derived by summing the posterior probability of recrudescence for each arm is denoted in each plot by a horizontal gray line. The cutoff for posterior probability at which a recurrence was classified as a recrudescence varied between  $\geq 0.1$  and 1.

Supplemental File: Microsatellite data
